# Supplementary material
Source: PubMed Central journal article supplement (PMC4383865)
Supplement: supp_ddv022_ddv022supp.pdf [file supp_ddv022_ddv022supp.pdf]

## SUPPLEMENTARY MATERIAL

### FIGURE S1

**A** Mapping data from the human deafness family. Genomewide SNP mapping in the deafness family revealed candidate regions with homozygosity by descent on chromosomes 6, 7 and 11. *AHI1* is localized about 5 Mb centromeric of the chromosome 6 candidate locus. **B** Western blot of fibroblast lysates that were probed with polyclonal rabbit IgG antibodies against *AHI1*. *AHI1* isoforms (red arrows) are expressed in fibroblasts from a homozygous mutation carrier, II:4, and in fibroblasts from a healthy control proband (ctrl.). PA5-30901 (left half of the panel) recognizes a region between *AHI1* residues 383-596, PA31846 (right half of the panel) recognizes a region between residues 1-231. As internal control, the monoclonal mouse anti  $\beta$ -actin (Sigma, Cat.-Nr. A2228) antibody recognizing human  $\beta$ -actin was used.

### FIGURE S2

**A** Detail of the family 1 pedigree showing SNP genotyping data of the siblings from genome-wide linkage analysis. Because *AHI1* locates within an HBD region (between SNPs rs2327578 and rs724875) shared by the three deaf individuals (II:3, II:5, II:6) and the healthy person II:4, the p.Arg1066\* mutation can be considered truly homozygous in all these individuals. **B** Overview of the family including the parents, showing heterozygous haplotypes in the parents.

### FIGURE S3

**A** Evolutionary conservation of the p.Ser671 residue. **B** WD40 repeats of *AHI1* as predicted by ScanProsite. Note that ScanProsite predicts only four of the seven WD40 repeats. **C** ScanProsite predicts loss of the WD40 repeat affected by the p.Ser671Leu mutation.

### TABLE S1

**Secondary structure prediction of AHI1 by the WDSP algorithm.** Each WD40 repeat starts from Loop\_da, followed by Strand a, Loop\_ab, Strand\_b, Loop\_bc, Strand\_c, Loop\_cd, and Strand d. Thus, KHLFSL is the Strand-d of WD7. The red residues are involved in hydrogen bond networks.

**TABLE S2**

**Secondary structure prediction of TLE1 by the WDSP algorithm.**

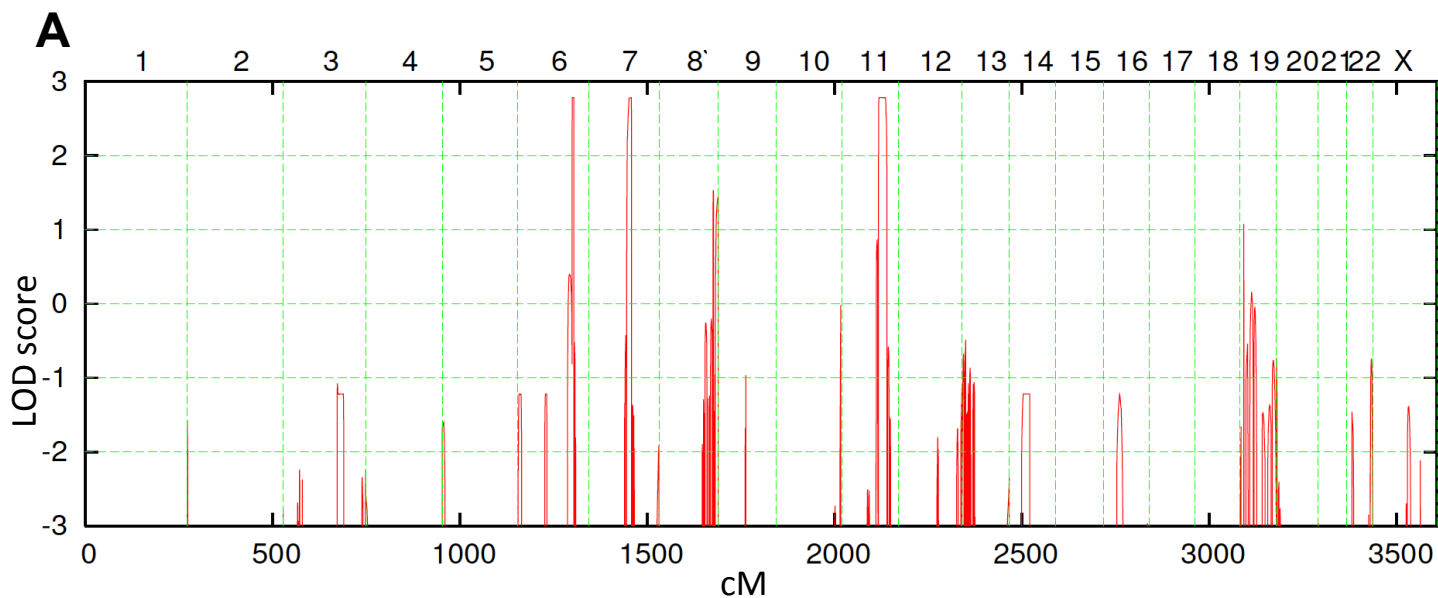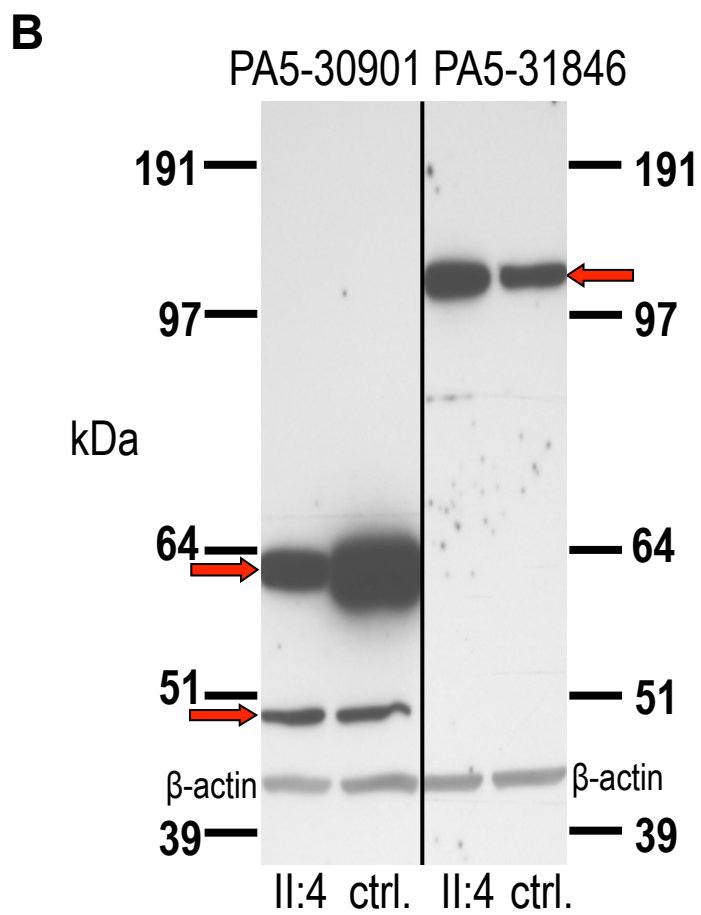





A

p.Ser761Leu

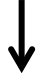

|   |   |   |   |   |   |   |   |   |   |          |   |   |   |       |       |       |       |       |       |       |       |       |
|---|---|---|---|---|---|---|---|---|---|----------|---|---|---|-------|-------|-------|-------|-------|-------|-------|-------|-------|
| L | C | F | D | T | E | G | H | H | M | <b>S</b> | G | D | C | T     | G     | V     | I     | V     | V     | W     | N     |       |
| L | C | F | D | T | E | G | H | H | M | <b>S</b> | G | D | C | T     | G     | V     | I     | V     | V     | W     | N     |       |
| I | C | F | D | D | E | G | H | H | M | <b>S</b> | G | D | C | I     | G     | V     | I     | V     | V     | W     | D     |       |
| L | C | F | D | P | E | G | S | R | M | F        | S | A | D | N     | S     | G     | L     | I     | I     | V     | W     | G     |
| L | C | F | D | I | E | G | L | Q | M | <b>S</b> | G | D | S | ----- | ----- | ----- | ----- | ----- | ----- | ----- | ----- | ----- |
| : | * | * | * |   | * | * |   | : | * | :        | * | : | * | .     | *     |       |       |       |       |       |       |       |

Human  
Rhesus monkey  
Mouse  
Zebrafish  
African clawed frog

B

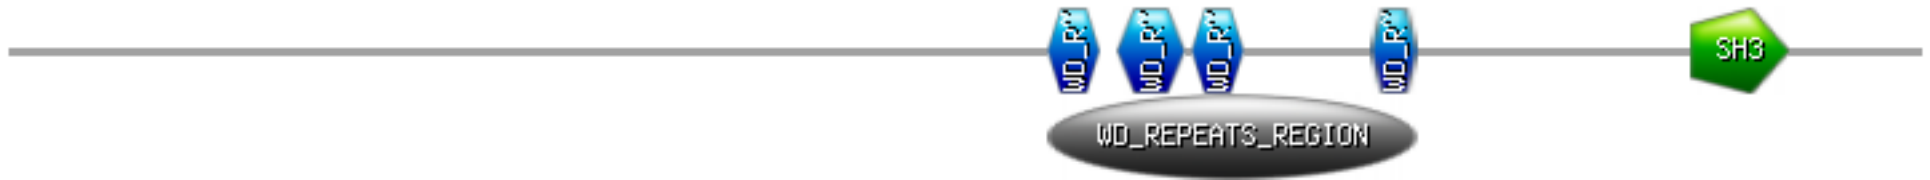

C

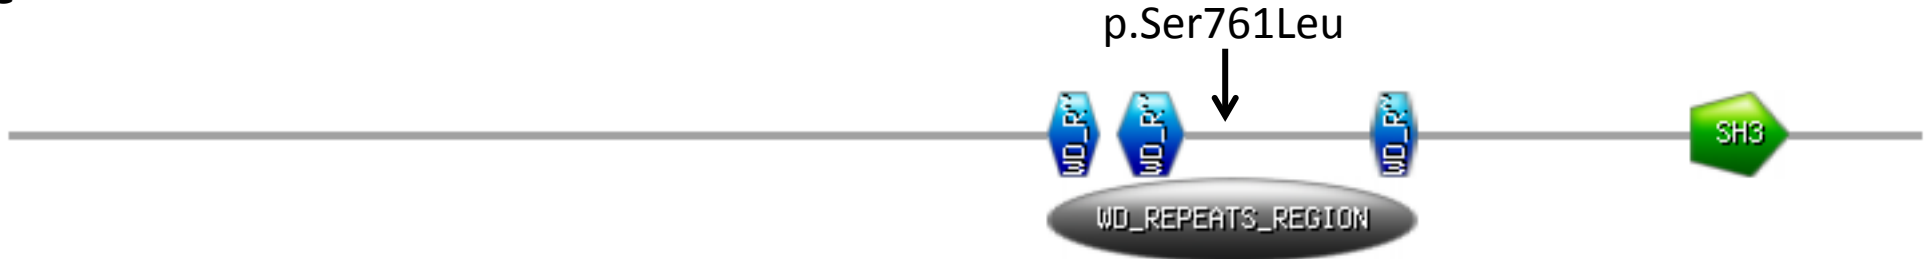

**Table S1. Secondary structure prediction of AH1 by the WDSP algorithm.** Each WD40 repeat starts from Loop\_da, followed by Strand a, Loop\_ab, Strand\_b, Loop\_bc, Strand\_c, Loop\_cd, and Strand d. Thus, KHLFSL is the Strand-d of WD7. The red residues are involved in hydrogen bond networks.

| Repeats | Score | Start | End | Strand_d | Loop_da   | Strand_a | Loop_ab | Strand_b | Loop_bc | Strand_c | Loop_cd          | H_bonds |
|---------|-------|-------|-----|----------|-----------|----------|---------|----------|---------|----------|------------------|---------|
| WD1     | 76    | 600   | 644 | KHLFSL   | NAGERG    | CFCLDF   | SHNGR   | ILAAAC   | ASRDGY  | PIILYE   | IPSG             | NA      |
| WD2     | 143   | 645   | 688 | RFMREL   | CGHLNI    | IYDLSW   | SKDDH   | YILTSS   | SDG     | TARIWK   | NEINNT           | Tetrad  |
| WD3     | 124   | 689   | 734 | NTFRVL   | PHPSF     | VYTAKF   | HPAVRE  | LVVTGC   | YDS     | MIRIWK   | VEMREDSA         | Tetrad  |
| WD4     | 117   | 735   | 788 | ILVRQF   | DVH737KSF | INSLCF   | DTEGH   | HMY761GD | CTG     | VIVW771N | TYVKINDLEHSVHHWT | Triad   |
| WD5     | 48    | 789   | 833 | INKEIK   | ETEFKIP   | ISYLEI   | HPNGK   | RLLIHT   | KDS     | TLRIMD   | LRILV            | NA      |
| WD6     | 82    | 834   | 877 | ARKFVG   | AANYREK   | IHSTLT   | PCGT    | FLFAGS   | EDG     | IVYVWN   | PETGEQ           | NA      |
| WD7     | 75    | 878   | 919 | VAMYSK   | LPFKSP    | IRDISY   | HPFEN   | MVAFCA   | FGQNEPI | LLIYD    |                  | NA      |

**Table S2. Secondary structure prediction of TLE1 by the WDSP algorithm.**

| Repeats | Score | Start | End | Strand_d | Loop_da   | Strand_a   | Loop_ab | Strand_b | Loop_bc | Strand_c | Loop_cd | H_bonds |
|---------|-------|-------|-----|----------|-----------|------------|---------|----------|---------|----------|---------|---------|
| WD1     | 107   | 476   | 512 | RQINTL   | NHGEVS    | VCAVTI     | SNPTR   | HVYTGG   | KG      | CVKVWD   | ISHPGNK | Triad   |
| WD2     | 94    | 519   | 559 | SPVSQL   | DCLNRDNYH | IRSCKL     | LPDGC   | TLIVGG   | EAS     | TLSIWD   | LAAPTP  | NA      |
| WD3     | 90    | 565   | 603 | RIKAEL   | TSSAPA    | CYALAI     | SPDSK   | VCFSKC   | SDG     | NIAVWD   | LHNQ    | NA      |
| WD4     | 134   | 607   | 645 | TLVRQF   | QGHTDG    | ASCIDI     | SNDGT   | KLWTGG   | LDN     | TVRSWD   | LREG    | Tetrad  |
| WD5     | 71    | 649   | 686 | RQLQQH   | DFTSQ     | IFSLGY     | CPTGE   | WLAVGM   | ESS     | NVEVLH   | VNK     | NA      |
| WD6     | 113   | 689   | 727 | PDKYQL   | HLHESC    | VL702SSLKF | AYCGK   | WFV715TG | KDN     | LLNAWR   | TPYGA   | Tetrad  |
| WD7     | 80    | 732   | 768 | SIFQSK   | ESSS      | VLSCDI     | SVDDK   | YIVTGS   | GDK     | KATVYE   |         | NA      |
